# Supplementary material for: Co-expression network analysis identified six hub genes in association with metastasis risk and prognosis in hepatocellular carcinoma
Source: PubMed Central journal article supplement (PMC5564739; doi:10.18632/oncotarget.16896), 2017-04-06
Supplement: oncotarget-08-48948-s001.pdf [file oncotarget-08-48948-s001.pdf]

# Co-expression network analysis identified six hub genes in association with metastasis risk and prognosis in hepatocellular carcinoma

## Supplementary Materials

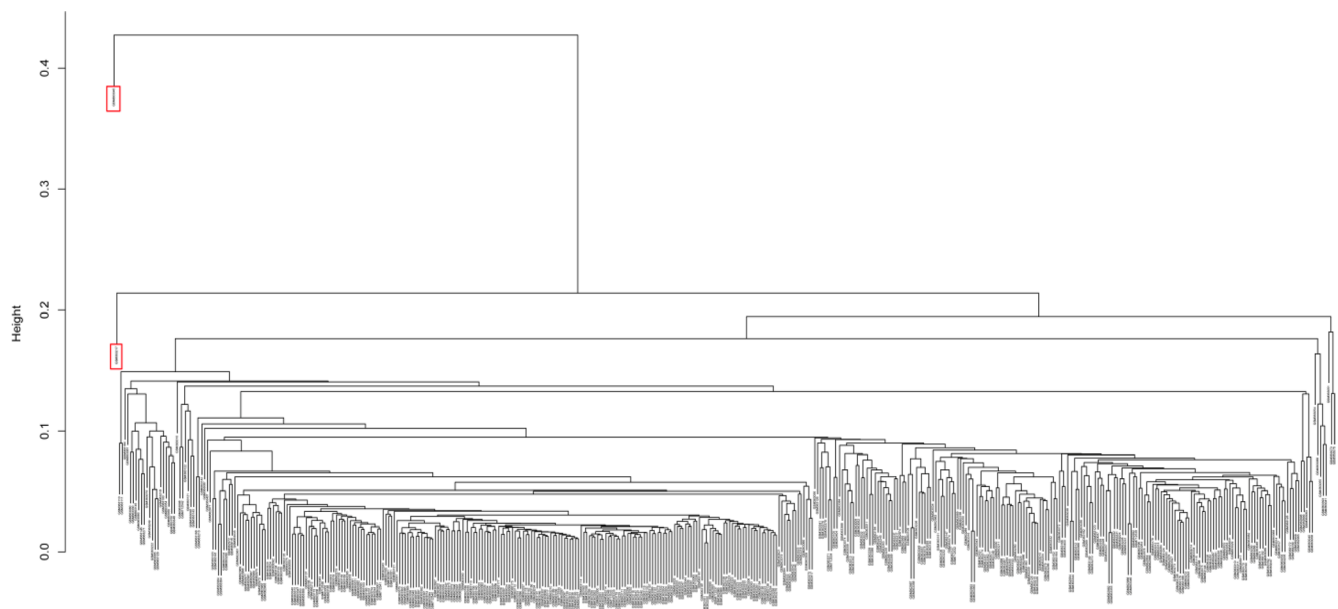

**Supplementary Figure 1: Samples clustering to detect outliers.** Outliers were marked by red box.

**Supplementary Table 1: The results of gene set enrichment analysis (GSEA)**

| Gene    | Gene set name                                   | Size | NOM <i>p</i> -val | FDR <i>q</i> -val |
|---------|-------------------------------------------------|------|-------------------|-------------------|
| CYP4A11 | KEGG_ARGININE_AND_PROLINE_METABOLISM            | 54   | 0.00984252        | 0.04466988        |
| CYP4A11 | KEGG_DRUG_METABOLISM_OTHER_ENZYMES              | 49   | 0.007920792       | 0.045204297       |
| CYP4A11 | KEGG_FATTY_ACID_METABOLISM                      | 40   | 0.002028398       | 0.04064595        |
| CYP4A11 | KEGG_GLYCINE_SERINE_AND_THREONINE_METABOLISM    | 31   | 0.011881189       | 0.044702593       |
| CYP4A11 | KEGG_GLYCOLYSIS_GLUCCONEOGENESIS                | 62   | 0                 | 0.047567338       |
| CYP4A11 | KEGG_PROPANOATE_METABOLISM                      | 32   | 0                 | 0.044567596       |
| CYP4A11 | KEGG_RETINOL_METABOLISM                         | 63   | 0.001996008       | 0.045562573       |
| DAO     | KEGG_VALINE_LEUCINE_AND_ISOLEUCINE_DEGRADATION  | 44   | 0.001862197       | 0.045630652       |
| CYP4A11 | KEGG_BETA_ALANINE_METABOLISM                    | 22   | 0.003921569       | 0.039482556       |
| EHHADH  | KEGG_BETA_ALANINE_METABOLISM                    | 22   | 0.002114165       | 0.04532506        |
| ALDH6A1 | KEGG_BIOSYNTHESIS_OF_UNSATURATED_FATTY_ACIDS    | 22   | 0.007662835       | 0.048352275       |
| CYP4A11 | KEGG_BIOSYNTHESIS_OF_UNSATURATED_FATTY_ACIDS    | 22   | 0.006012024       | 0.047735304       |
| ALDH6A1 | KEGG_CITRATE_CYCLE_TCA_CYCLE                    | 30   | 0.022944551       | 0.04493482        |
| CYP4A11 | KEGG_CITRATE_CYCLE_TCA_CYCLE                    | 30   | 0.026717557       | 0.04893512        |
| CYP4A11 | KEGG_HISTIDINE_METABOLISM                       | 29   | 0.006085193       | 0.045396846       |
| DAO     | KEGG_HISTIDINE_METABOLISM                       | 29   | 0.005639098       | 0.049265344       |
| CYP4A11 | KEGG_INSULIN_SIGNALING_PATHWAY                  | 137  | 0.002004008       | 0.045711208       |
| DAO     | KEGG_INSULIN_SIGNALING_PATHWAY                  | 137  | 0                 | 0.04504649        |
| CYP4A11 | KEGG_LYSINE_DEGRADATION                         | 44   | 0                 | 0.030853108       |
| EHHADH  | KEGG_LYSINE_DEGRADATION                         | 44   | 0.006097561       | 0.042179737       |
| ALDH6A1 | KEGG_PPAR_SIGNALING_PATHWAY                     | 69   | 0.006060606       | 0.0493711         |
| CYP4A11 | KEGG_PPAR_SIGNALING_PATHWAY                     | 69   | 0.008             | 0.043602936       |
| CYP4A11 | KEGG_SELENOAMINO_ACID_METABOLISM                | 26   | 0.008333334       | 0.043966673       |
| EHHADH  | KEGG_SELENOAMINO_ACID_METABOLISM                | 26   | 0.024793388       | 0.04877707        |
| ALDH6A1 | KEGG_STARCH_AND_SUCROSE_METABOLISM              | 49   | 0                 | 0.04771494        |
| CYP4A11 | KEGG_STARCH_AND_SUCROSE_METABOLISM              | 49   | 0                 | 0.04236301        |
| ALDH6A1 | KEGG_TRYPTOPHAN_METABOLISM                      | 40   | 0.005882353       | 0.048187822       |
| CYP4A11 | KEGG_TRYPTOPHAN_METABOLISM                      | 40   | 0.001960784       | 0.043768384       |
| CYP4A11 | KEGG_ALANINE_ASPARTATE_AND_Glutamate_METABOLISM | 32   | 0                 | 0.042099196       |
| DAO     | KEGG_ALANINE_ASPARTATE_AND_Glutamate_METABOLISM | 32   | 0.001934236       | 0.04785948        |
| EHHADH  | KEGG_ALANINE_ASPARTATE_AND_Glutamate_METABOLISM | 32   | 0.002096436       | 0.047264945       |
| CYP4A11 | KEGG_COMPLEMENT_AND_COAGULATION_CASCADES        | 68   | 0.008492569       | 0.04539779        |
| DAO     | KEGG_COMPLEMENT_AND_COAGULATION_CASCADES        | 68   | 0.001869159       | 0.049896725       |
| EHHADH  | KEGG_COMPLEMENT_AND_COAGULATION_CASCADES        | 68   | 0.007968128       | 0.047319017       |
| ALDH6A1 | KEGG_CYSTEINE_AND_METHIONINE_METABOLISM         | 34   | 0.011673152       | 0.047433827       |
| CYP4A11 | KEGG_CYSTEINE_AND_METHIONINE_METABOLISM         | 34   | 0                 | 0.04548778        |
| EHHADH  | KEGG_CYSTEINE_AND_METHIONINE_METABOLISM         | 34   | 0.010183299       | 0.04485606        |
| CYP4A11 | KEGG_DRUG_METABOLISM_CYTOCHROME_P450            | 71   | 0.002004008       | 0.041317035       |
| DAO     | KEGG_DRUG_METABOLISM_CYTOCHROME_P450            | 71   | 0                 | 0.047369774       |
| EHHADH  | KEGG_DRUG_METABOLISM_CYTOCHROME_P450            | 71   | 0.00409836        | 0.049592838       |
| ALDH6A1 | KEGG_PEROXISOME                                 | 77   | 0                 | 0.04407879        |
| CYP4A11 | KEGG_PEROXISOME                                 | 77   | 0                 | 0.02629046        |
| DAO     | KEGG_PEROXISOME                                 | 77   | 0                 | 0.035167508       |
| ALDH6A1 | KEGG_TYROSINE_METABOLISM                        | 42   | 0                 | 0.045588132       |
| CYP4A11 | KEGG_TYROSINE_METABOLISM                        | 42   | 0.004016064       | 0.043317467       |
| DAO     | KEGG_TYROSINE_METABOLISM                        | 42   | 0                 | 0.045740474       |

FDR: false discovery rate.
